# Supplementary material for: Mesoporous Mn–Fe oxyhydroxides for oxygen evolution
Source: Royal Society of Chemistry journal article supplement (doi:10.1039/d2qi00722c), 2022-01-01
Supplement: d2qi00722c1.pdf [file d2qi00722c1.pdf]

## Supporting Information

### Mesoporous Mn-Fe oxyhydroxides for oxygen evolution

Jingyi Han,<sup>a,†</sup> Mingzhu Zhang,<sup>b,†</sup> Xue Bai,<sup>a</sup> Zhiyao Duan,<sup>b,\*</sup> Tianmi Tang,<sup>a</sup> and Jingqi Guan<sup>a,\*</sup>

<sup>a</sup> Institute of Physical Chemistry, College of Chemistry, Jilin University, 2519 Jiefang Road, Changchun 130021, P.R. China. \*E-mail: [guanjq@jlu.edu.cn](mailto:guanjq@jlu.edu.cn)

<sup>b</sup> State Key Laboratory of Solidification Processing, School of Materials Science and Engineering, Northwestern Polytechnical University, Xi'an 710072, P. R. China, \*E-mail: [zhiyao.duan@nwpu.edu.cn](mailto:zhiyao.duan@nwpu.edu.cn)

<sup>†</sup>These authors contributed equally to this work.

#### Synthesis of Meso-Mn<sub>1</sub>Fe<sub>n</sub>O<sub>x</sub>

Meso-Mn<sub>1</sub>Fe<sub>n</sub>O<sub>x</sub> with different Fe/Mn ratios were synthesized via a facile co-precipitation route. Firstly, 0.5 g polyethylene oxide–polypropylene oxide–polyethylene oxide (P123) was dissolved in 50 ml deionized water (DW). Then, MnCl<sub>2</sub>·4H<sub>2</sub>O (1 mmol) and FeCl<sub>3</sub> (0.4 - 1.2 mmol) were added to the above solution under stirring. Afterwards, Na<sub>2</sub>CO<sub>3</sub> solution was slowly added. When the reaction was complete, the mixture was filtered and washed with DW and ethanol. Finally, the

obtained precursor was dried at 35 °C for 12 h to obtain Meso-Mn<sub>1</sub>Fe<sub>n</sub>O<sub>x</sub>. For comparison, Meso-MnO<sub>x</sub> and Meso-FeO<sub>x</sub> were synthesized following a process similar to that for Meso-Mn<sub>1</sub>Fe<sub>n</sub>O<sub>x</sub>.

## **Characterization**

Transmission electron microscope (TEM) images were observed by a HITACHI HT7700. High-resolution TEM (HRTEM) images were recorded on a JEM-2100 transmission electron microscope (Tokyo, Japan) at 200 kV. SEM images were recorded on a HITACHI SU8020 field emission scanning electron microscope. The valence state was determined using XPS recorded on a Thermo ESCALAB 250Xi. The X-ray source selected was monochromatized Al K $\alpha$  source (15 kV, 10.8 mA). Region scans were collected using a 30 eV pass energy. Peak positions were calibrated relative to C 1s peak position at 284.6 eV.

## **Electrochemical measurements**

All electrochemical measurements were performed on a CHI760E electrochemical working station at room temperature. The catalysts were measured in 1.0 M KOH aqueous solution using a typical three-electrode configuration, in which glassy carbon electrode (GCE) was used as the working electrode; platinum plate and saturated calomel electrode (SCE, saturated KCl) were used as the counter and reference electrodes, respectively. Linear sweep voltammetry (LSV) polarization curves were acquired at a scan rate of 1 mV·s<sup>-1</sup>

with 90% *iR*-compensation. Electrochemical impedance spectroscopy (EIS) measurements were performed at open-circuit potential in the frequency range from 100 kHz to 0.1 Hz with an a.c. perturbation of 5 mV. All potentials measured were calibrated to RHE using the following equation:  $E$  (versus RHE) =  $E$  (versus SCE) + 0.241 V + 0.0591 pH.

### Computational methods

Spin-polarized DFT calculations were performed using the Vienna Ab initio Simulation Package.<sup>1, 2</sup> The generalized gradient approximation with the PBE functional<sup>3</sup> was used to describe the exchange and correlation energy. Electron-ion interactions were treated by the projector augmented wave method.<sup>4</sup> In all calculations, the energy cutoff of the plane-wave basis set was 400 eV. DFT+U method was applied to 3*d* orbitals of Fe and Co to correct the on site Coulomb interactions.<sup>5</sup>  $U_{\text{eff}} = 5$  eV were used for both Fe and Mn to reproduce the electronic structure that has been observed experimentally.<sup>6</sup> Brillouin zone was sampled by Monkhorst-Pack k-point meshes.<sup>7</sup> Optimized structures were obtained by minimizing the forces on each ion until they fell below 0.05 eV/Å. The solvation effects were also considered using an implicit solvation model implemented in VASP.<sup>8</sup> The relative permittivity for the continuum solvent was set to 80 to simulate a water environment. The OER activities of various active sites are evaluated using the computational hydrogen electrode method.<sup>9</sup>

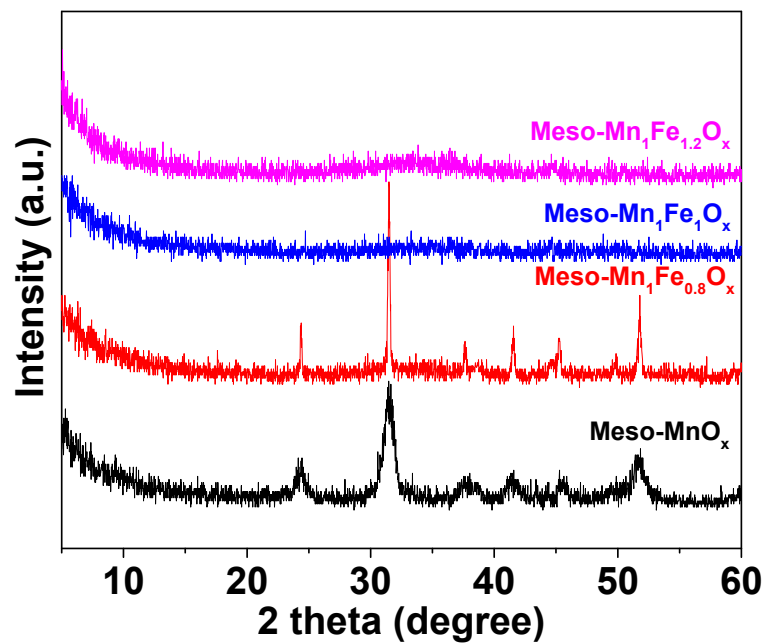

**Figure S1.** XRD patterns of  $\text{Meso-MnO}_x$ ,  $\text{Meso-Mn}_1\text{Fe}_{0.8}\text{O}_x$ ,  $\text{Meso-Mn}_1\text{Fe}_1\text{O}_x$ , and  $\text{Meso-Mn}_1\text{Fe}_{1.2}\text{O}_x$ .

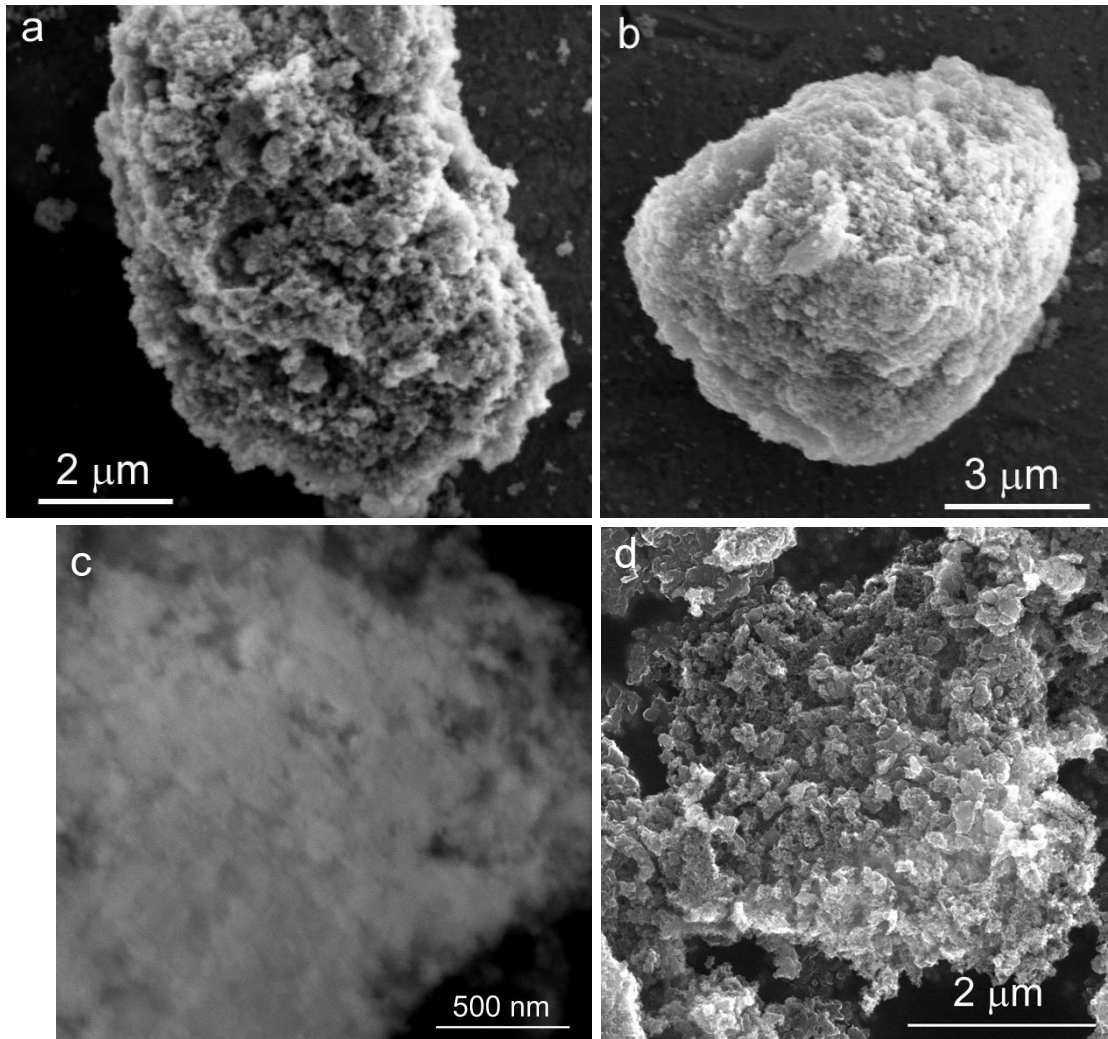

**Figure S2.** SEM images of (a) Meso-Mn<sub>1</sub>Fe<sub>0.8</sub>O<sub>x</sub>, (b) Meso-Mn<sub>1</sub>Fe<sub>1.2</sub>O<sub>x</sub>, (c) FeO<sub>x</sub> and (d) MnO<sub>x</sub>.

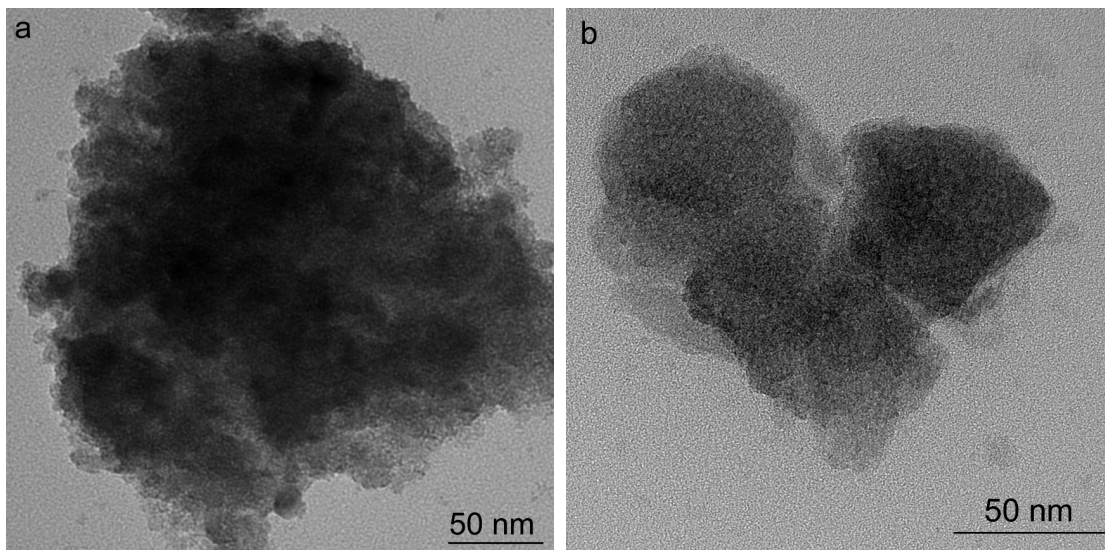

**Figure S3.** TEM images of (a) FeO<sub>x</sub> and (b) MnO<sub>x</sub>.

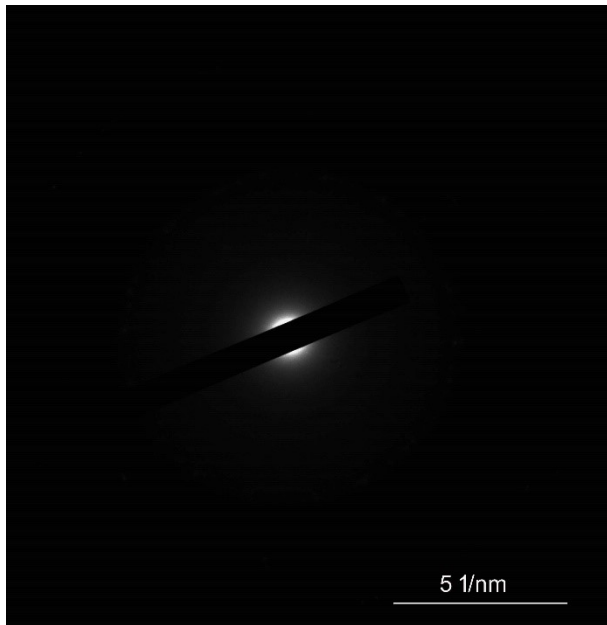

**Figure S4.** SAED pattern of Meso-Mn<sub>1</sub>Fe<sub>1</sub>O<sub>x</sub>.

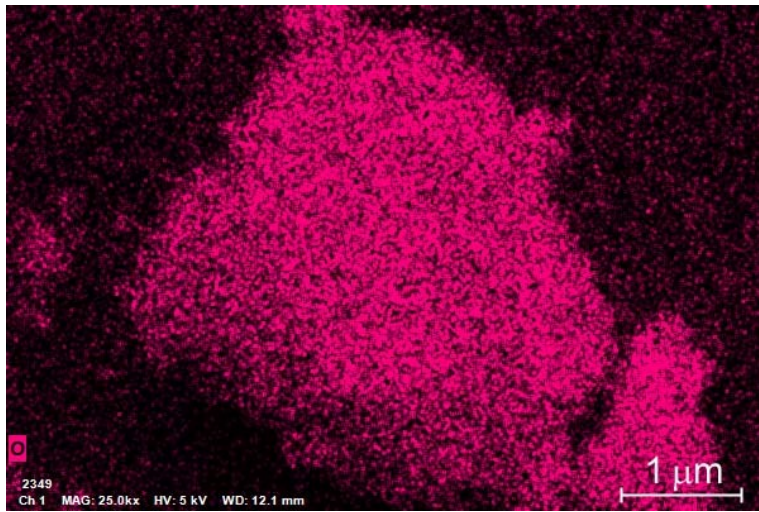

**Figure S5.** Element mapping of O.



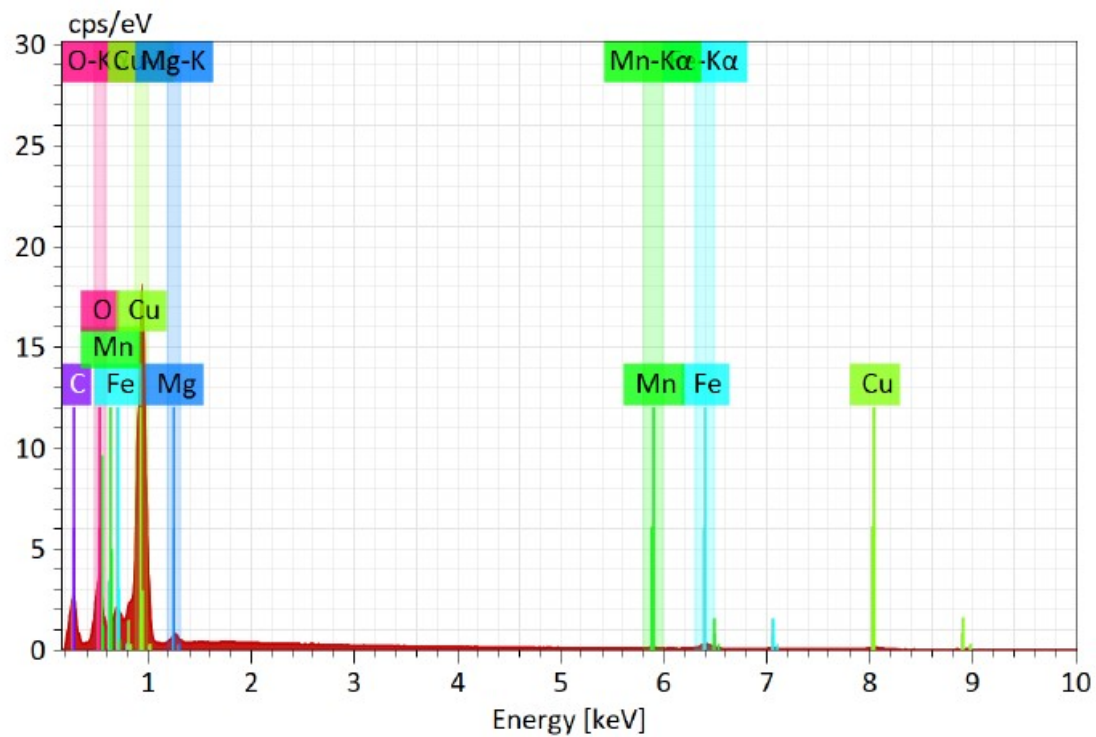

**Figure S6.** SEM-EDS of the Meso-Mn<sub>1</sub>Fe<sub>1</sub>O<sub>x</sub> supported on copper grid.

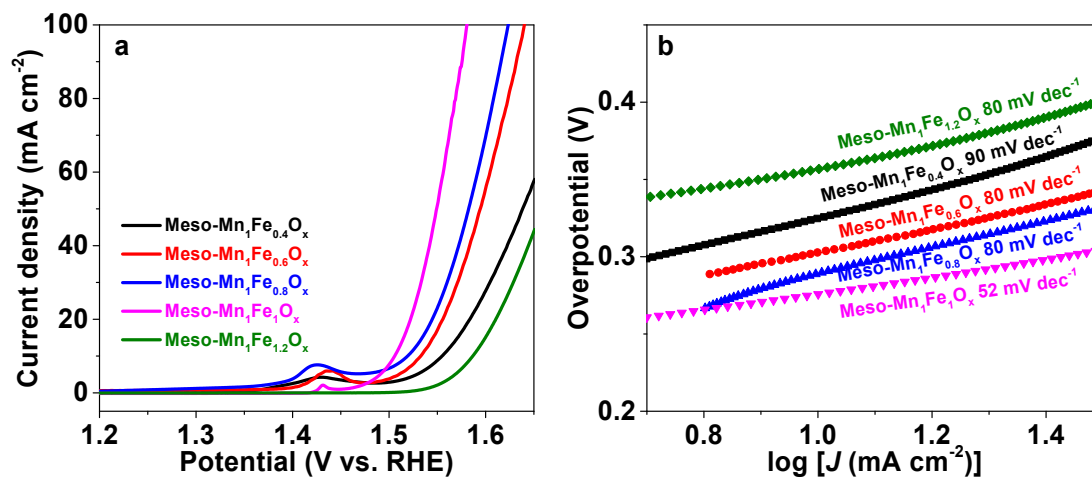

Figure S7. (a) OER polarization curves of Meso-Mn<sub>1</sub>Fe<sub>n</sub>O<sub>x</sub>. (b) Tafel slopes.

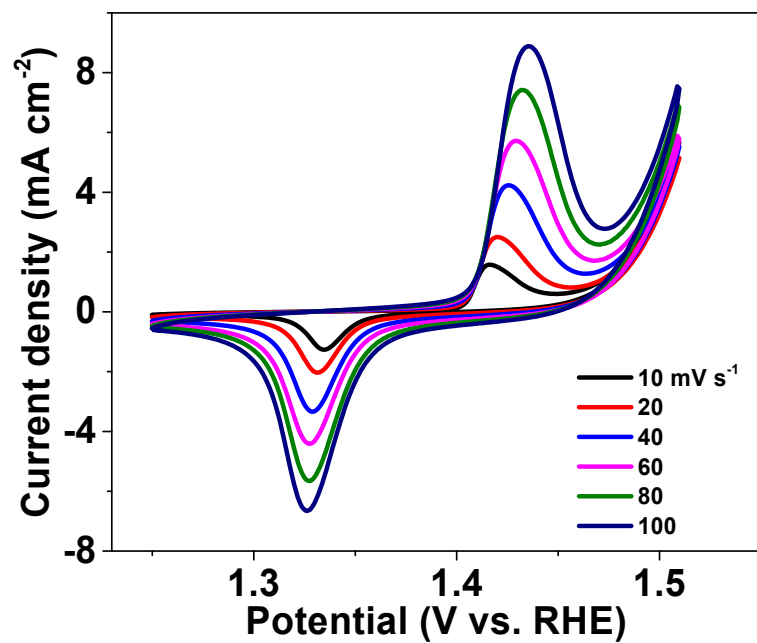

**Figure S8.** CV of Meso-Mn<sub>1</sub>Fe<sub>1</sub>O<sub>x</sub> in 1 M KOH at scan rates of 10–100 mV s<sup>-1</sup>.

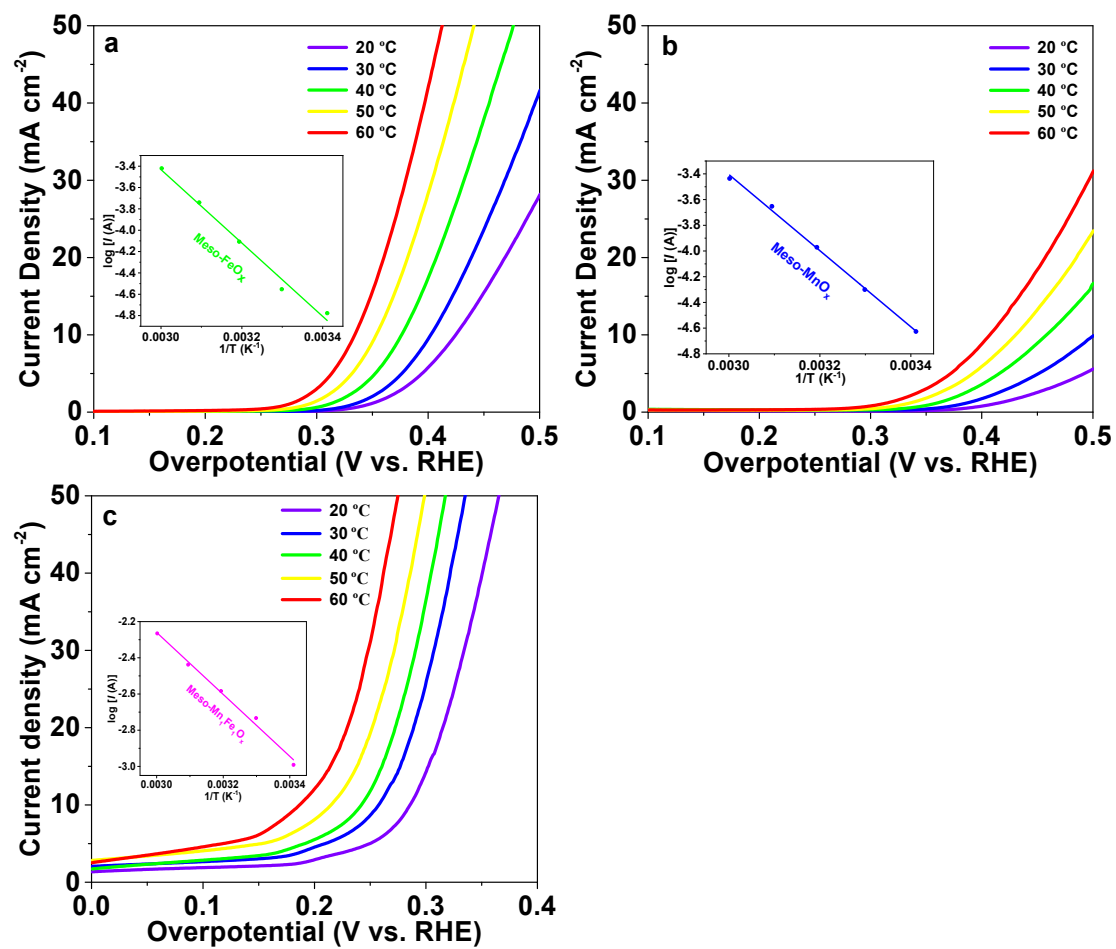

**Figure S9.** OER polarization curves of (a) Meso-FeO<sub>x</sub>, (b) Meso-MnO<sub>x</sub>, and (c) Meso-Mn<sub>1</sub>Fe<sub>1</sub>O<sub>x</sub> in three-electrode configuration in 1 M KOH at 20 °C, 30 °C, 40 °C, 50 °C, and 60 °C.

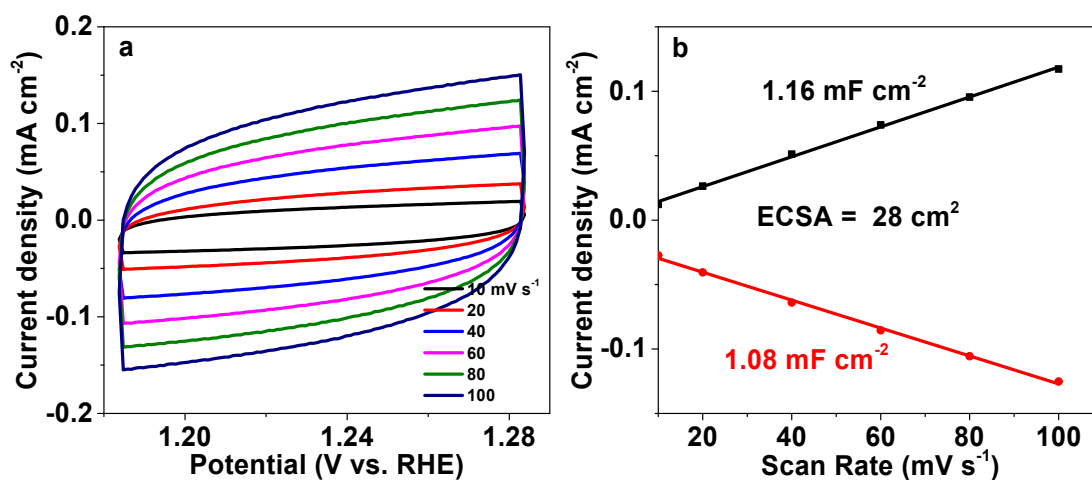

**Figure S10.** (a) CVs of Meso-FeO<sub>x</sub> measured in a non-Faradaic region at scan rate of 20 mV s<sup>-1</sup>, 40 mV s<sup>-1</sup>, 60 mV s<sup>-1</sup>, 80 mV s<sup>-1</sup>, and 100 mV s<sup>-1</sup>. (b) The cathodic (black) and anodic (red) currents measured at 1.234 V vs RHE as a function of the scan rate. The average of the absolute value of the slope is taken as the double-layer capacitance of the electrode.

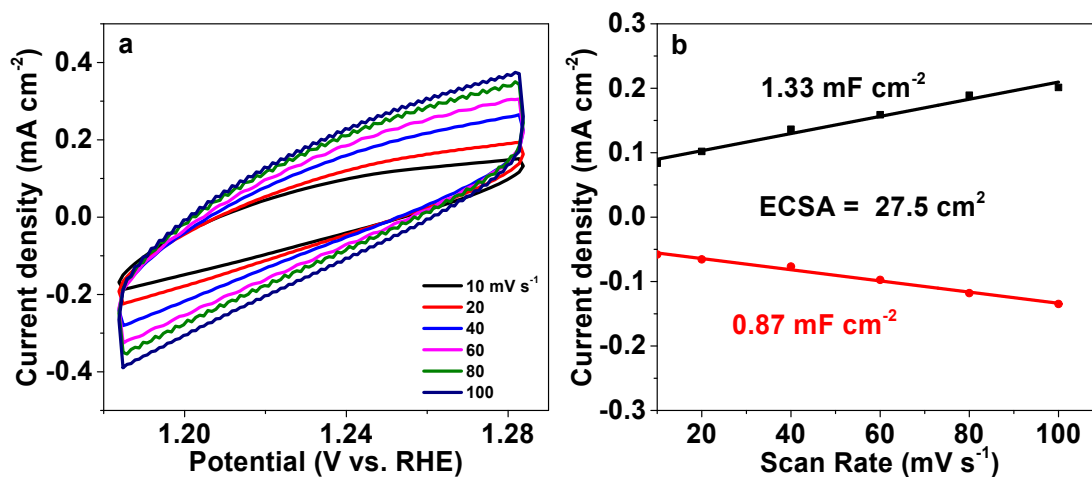

**Figure S11.** (a) CVs of Meso-MnO<sub>x</sub> measured in a non-Faradaic region at scan rate of 20 mV s<sup>-1</sup>, 40 mV s<sup>-1</sup>, 60 mV s<sup>-1</sup>, 80 mV s<sup>-1</sup>, and 100 mV s<sup>-1</sup>. (b) The cathodic (black) and anodic (red) currents measured at 1.234 V vs RHE as a function of the scan rate. The average of the absolute value of the slope is taken as the double-layer capacitance of the electrode.

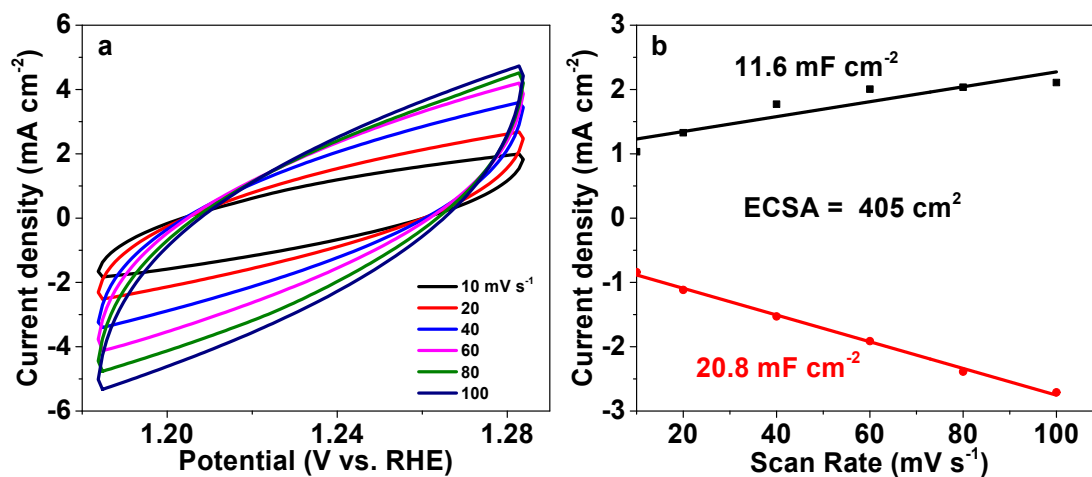

**Figure S12.** (a) CVs of Meso-Mn<sub>1</sub>Fe<sub>1</sub>O<sub>x</sub> measured in a non-Faradaic region at scan rate of 20 mV s<sup>-1</sup>, 40 mV s<sup>-1</sup>, 60 mV s<sup>-1</sup>, 80 mV s<sup>-1</sup>, and 100 mV s<sup>-1</sup>. (b) The cathodic (black) and anodic (red) currents measured at 1.234 V vs RHE as a function of the scan rate. The average of the absolute value of the slope is taken as the double-layer capacitance of the electrode.

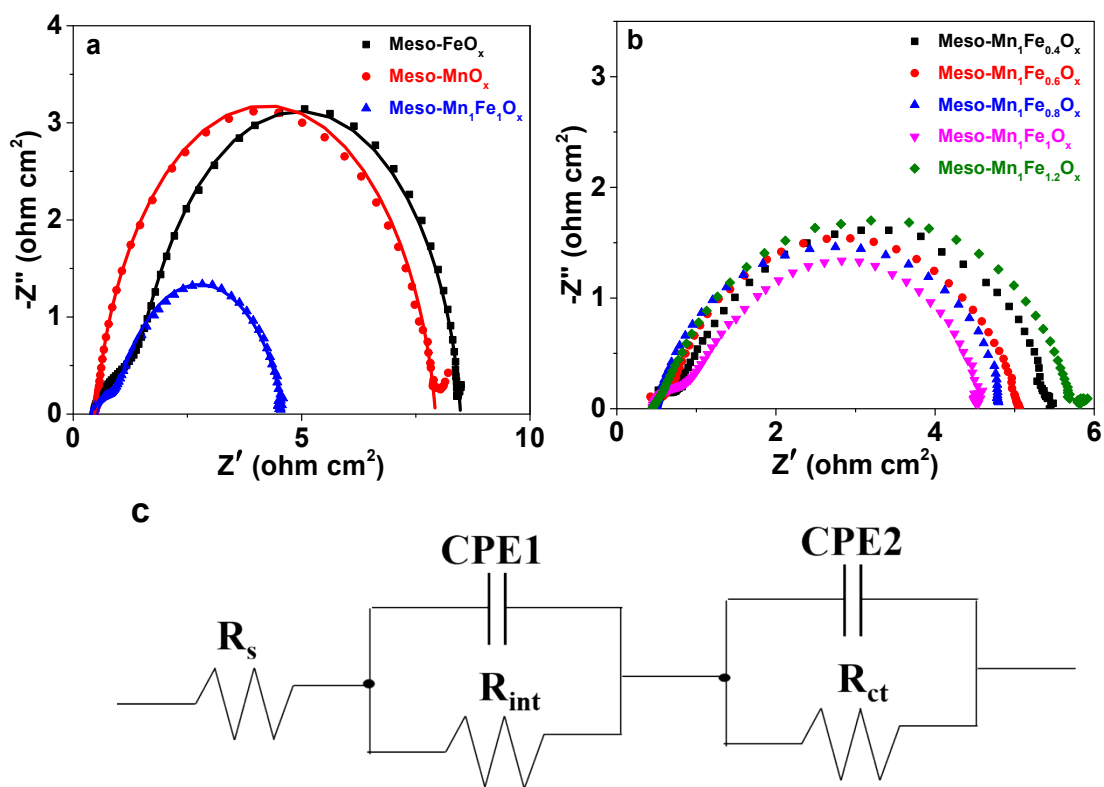

**Figure S13.** (a) Nyquist plots of the EIS test for Meso-FeO<sub>x</sub>, Meso-MnO<sub>x</sub>, and Meso-Mn<sub>1</sub>Fe<sub>1</sub>O<sub>x</sub>. (b) Nyquist plots of the EIS test for Meso-Mn<sub>1</sub>Fe<sub>n</sub>O<sub>x</sub>. (c) The equivalent circuit used for fitting the Nyquist plots. R<sub>s</sub>, R<sub>ct</sub> and R<sub>int</sub> represent the series resistance, charge-transfer resistance and solid-electrolyte interface resistance, respectively; and the parameters of CPE1 and CPE2 correspond to the double-layer capacitance and the Faradic capacitance, respectively.



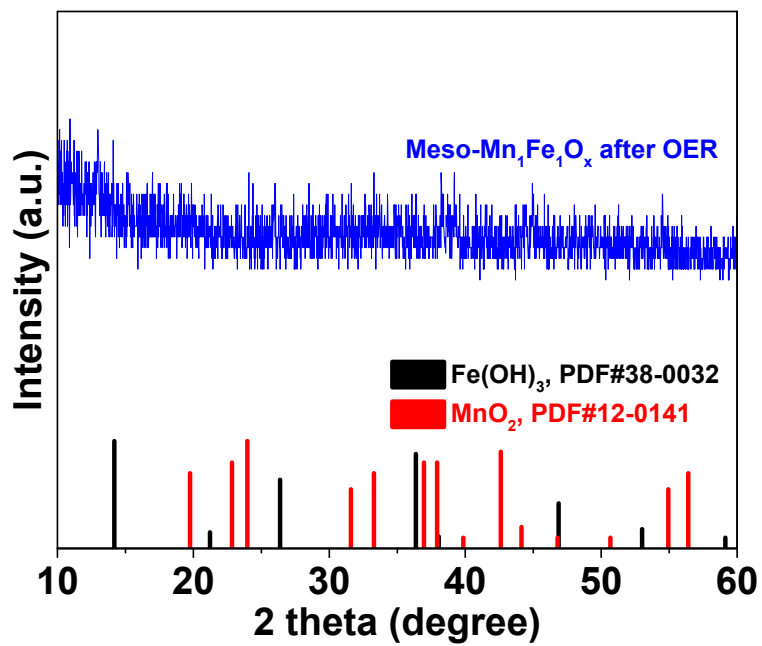

Figure S14. XRD pattern of the used Mn<sub>1</sub>Fe<sub>1</sub>O<sub>x</sub>.

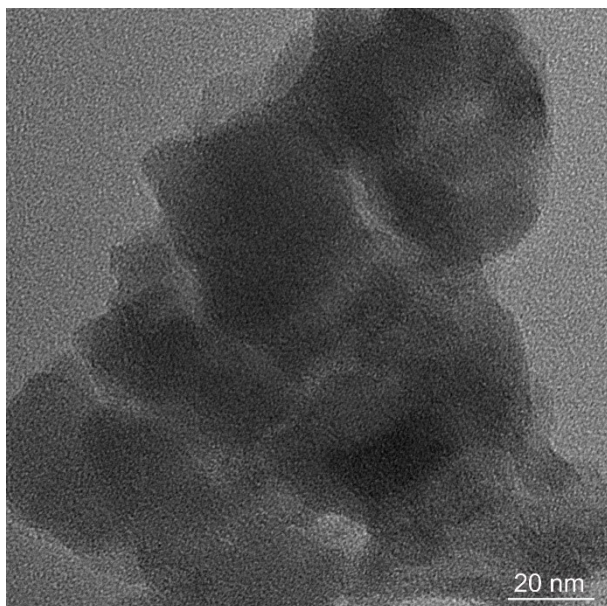

**Figure S15.** TEM image of the used Mn<sub>1</sub>Fe<sub>1</sub>O<sub>x</sub>.

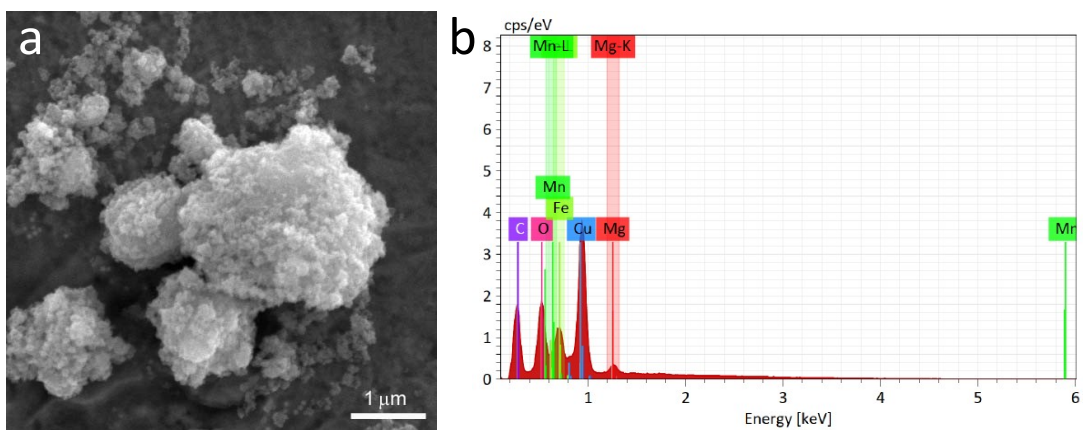

**Figure S16.** (a) SEM image and (b) EDS spectrum of the used  $\text{Mn}_1\text{Fe}_1\text{O}_x$  supported on copper grid.

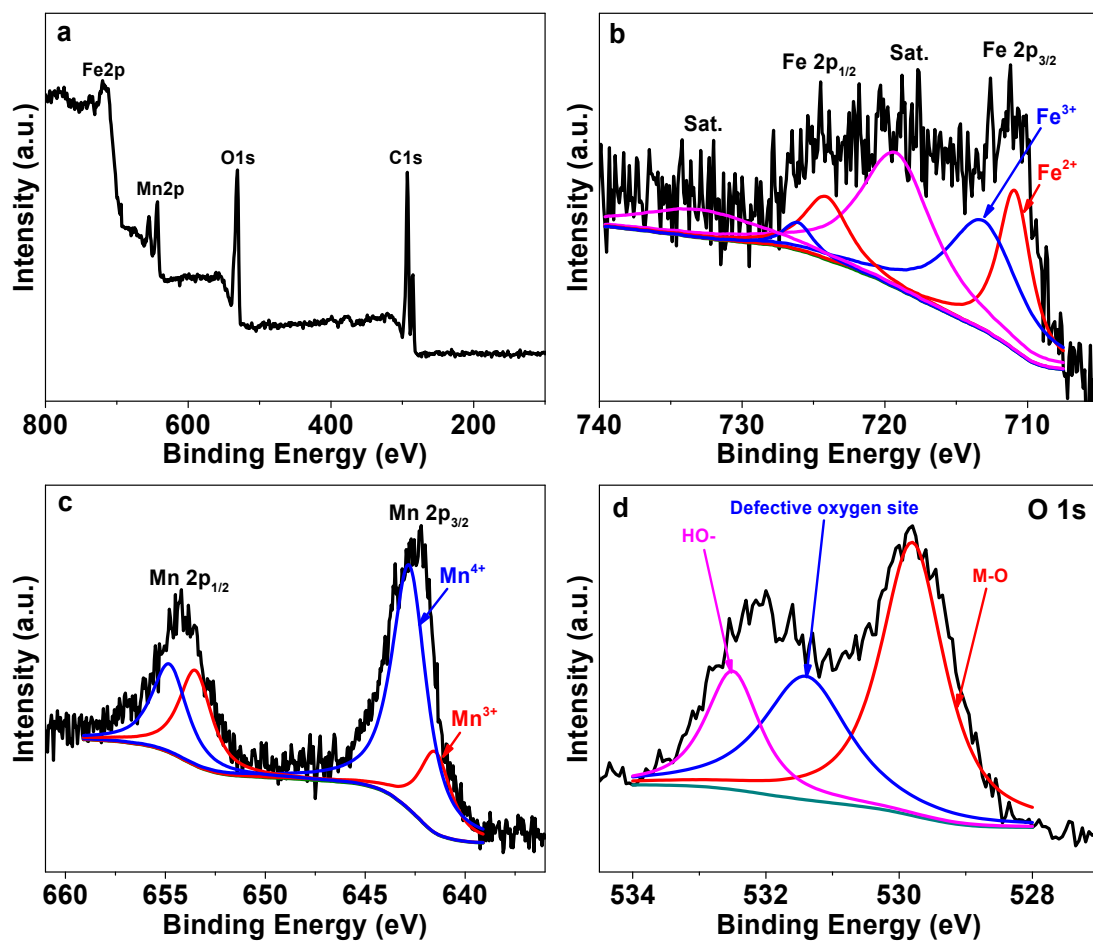

**Figure S17.** (a) XPS survey spectrum of the used  $\text{Mn}_1\text{Fe}_1\text{O}_x$ . (b) High-resolution Fe 2p XPS spectrum. (c) High-resolution Mn 2p XPS spectrum. (d) High-resolution O 1s XPS spectrum.

**Table S1** Comparison of OER performance of Meso-Mn<sub>1</sub>Fe<sub>1</sub>O<sub>x</sub> with other MnFe-based catalysts in 1.0 M KOH

| catalyst                                                                | $\eta$ @ 10mA cm <sup>-2</sup><br>(mV) | Tafel slope (mV dec <sup>-1</sup> ) | Ref.      |
|-------------------------------------------------------------------------|----------------------------------------|-------------------------------------|-----------|
| Meso-Mn <sub>1</sub> Fe <sub>1</sub> O <sub>x</sub>                     | 275                                    | 52                                  | This work |
| Mn-Fe oxide/CC                                                          | 730                                    | 80                                  | 10        |
| Mn <sub>0.5</sub> Fe <sub>2.5</sub> O <sub>4</sub> NP/MC                | 560                                    | 129                                 | 11        |
| MnFe <sub>2</sub> O <sub>4</sub> NP/MC                                  | 510                                    | 88                                  | 11        |
| Fe/Mn-N-C                                                               | 360                                    | 60                                  | 12        |
| Fe <sub>1.1</sub> Mn <sub>0.9</sub> P                                   | 440                                    | 62                                  | 13        |
| MnFe <sub>2</sub> O <sub>4</sub> /NF                                    | 310                                    | 65                                  | 14        |
| MnFe <sub>2</sub> O <sub>4</sub>                                        | 582                                    | 71                                  | 15        |
| Fe-Mn-O NS/CC                                                           | 273                                    | 63.9                                | 16        |
| Mn-Fe <sub>2</sub> O <sub>3</sub>                                       | 351                                    | 102                                 | 17        |
| a-Fe-Mn:Pi                                                              | 252                                    | 52                                  | 18        |
| $\alpha$ -Mn <sub>1-x</sub> Fe <sub>x</sub> O <sub>2</sub>              | 400                                    | 59                                  | 19        |
| Mn <sub>0.5</sub> (Fe <sub>0.3</sub> Ni <sub>0.7</sub> ) <sub>0.5</sub> | 340                                    | -                                   | 20        |
| Fe <sub>2</sub> O <sub>3</sub> -MnO/NF                                  | 370                                    | 66                                  | 21        |
| Mn-FeOOH/FTO                                                            | 246                                    | 71                                  | 22        |
| Fe-MnSe/NF                                                              | 247                                    | 35                                  | 23        |
| Mn@HUST-8                                                               | 485                                    | 240.8                               | 24        |
| P-FeMnO <sub>x</sub>                                                    | 251                                    | -                                   | 25        |

## References

1. Kresse and Hafner, Ab initio molecular dynamics for liquid metals, *Physical review. B, Condensed matter*, 1993, **47**, 558-561.
2. Kresse and Furthmuller, Efficient iterative schemes for ab initio total-energy calculations using a plane-wave basis set, *Physical review. B, Condensed matter*, 1996, **54**, 11169-11186.
3. Perdew, Burke and Ernzerhof, Generalized gradient approximation made simple, *Phys. Rev. Lett.*, 1996, **77**, 3865-3868.
4. Blochl, Projector augmented-wave method, *Physical review. B, Condensed matter*, 1994, **50**, 17953-17979.
5. S. L. Dudarev, G. A. Botton, S. Y. Savrasov, C. J. Humphreys and A. P. Sutton, Electron-energy-loss spectra and the structural stability of nickel oxide: An LSDA+U study, *Physical Review B*, 1998, **57**, 1505-1509.
6. A. Rohrbach, J. Hafner and G. Kresse, Ab initio study of the (0001) surfaces of hematite and chromia: Influence of strong electronic correlations, *Physical Review B*, 2004, **70**.
7. Froyen, Brillouin-zone integration by Fourier quadrature: Special points for superlattice and supercell calculations, *Physical review. B, Condensed matter*, 1989, **39**, 3168-3172.
8. K. Mathew, R. Sundararaman, K. Letchworth-Weaver, T. A. Arias and R. G. Hennig, Implicit solvation model for density-functional study of nanocrystal

- surfaces and reaction pathways, *J. Chem. Phys.*, 2014, **140**.
9. J. K. Nørskov, J. Rossmeisl, A. Logadottir, L. Lindqvist, J. R. Kitchin, T. Bligaard and H. Jónsson, Origin of the Overpotential for Oxygen Reduction at a Fuel-Cell Cathode, *J. Phys. Chem. B*, 2004, **108**, 17886-17892.
  10. N. Bhandary, P. P. Ingole and S. Basu, Electrosynthesis of Mn-Fe oxide nanopetals on carbon paper as bi-functional electrocatalyst for oxygen reduction and oxygen evolution reaction, *Int. J. Hydrogen Energy*, 2018, **43**, 3165-3171.
  11. Y. Konno, T. Yamamoto and T. Nagayama, Nanoporous manganese ferrite films by anodising electroplated Fe-Mn alloys for bifunctional oxygen electrodes, *Nanoscale*, 2021, **13**, 12738-12749.
  12. X. Wu, Y. Niu, B. Feng, Y. Yu, X. Huang, C. Zhong, W. Hu and C. M. Li, Mesoporous Hollow Nitrogen-Doped Carbon Nanospheres with Embedded MnFe<sub>2</sub>O<sub>4</sub>/Fe Hybrid Nanoparticles as Efficient Bifunctional Oxygen Electrocatalysts in Alkaline Media, *ACS Appl Mater Interfaces*, 2018, **10**, 20440-20447.
  13. D. Li, H. Baydoun, B. Kulikowski and S. L. Brock, Boosting the Catalytic Performance of Iron Phosphide Nanorods for the Oxygen Evolution Reaction by Incorporation of Manganese, *Chem. Mater.*, 2017, **29**, 3048-3054.
  14. M. Li, Y. Xiong, X. Liu, X. Bo, Y. Zhang, C. Han and L. Guo, Facile synthesis of electrospun MFe<sub>2</sub>O<sub>4</sub> (M = Co, Ni, Cu, Mn) spinel nanofibers with excellent electrocatalytic properties for oxygen evolution and hydrogen peroxide reduction, *Nanoscale*, 2015, **7**, 8920-8930.

15. C. Si, Y. Zhang, C. Zhang, H. Gao, W. Ma, L. Lv and Z. Zhang, Mesoporous nanostructured spinel-type  $MFe_2O_4$  ( $M = Co, Mn, Ni$ ) oxides as efficient bifunctional electrocatalysts towards oxygen reduction and oxygen evolution, *Electrochim. Acta*, 2017, **245**, 829-838.
16. Y. Teng, X.-D. Wang, J.-F. Liao, W.-G. Li, H.-Y. Chen, Y.-J. Dong and D.-B. Kuang, Atomically Thin Defect-Rich Fe-Mn-O Hybrid Nanosheets as High Efficient Electrocatalyst for Water Oxidation, *Adv. Funct. Mater.*, 2018, **28**.
17. M. S. Burke, L. J. Enman, A. S. Batchellor, S. Zou and S. W. Boettcher, Oxygen Evolution Reaction Electrocatalysis on Transition Metal Oxides and (Oxy)hydroxides: Activity Trends and Design Principles, *Chem. Mater.*, 2015, **27**, 7549-7558.
18. Y. Liu, J. Zhang, W. Wang, L. Cao and B. Dong, Two-Phase Colloidal Synthesis of Amorphous Iron-Doped Manganese Phosphate Hollow Nanospheres for Efficient Water Oxidation, *Adv. Sustainable Syst.*, 2020, **4**.
19. J. M. Lee, S. B. Patil, B. Kang, S. Lee, M. G. Kim and S.-J. Hwang, Understanding the crucial role of local crystal order in the electrocatalytic activity of crystalline manganese oxide, *J. Mater. Chem. A*, 2018, **6**, 12565-12573.
20. D. M. Morales, M. A. Kazakova, S. Dieckhöfer, A. G. Selyutin, G. V. Golubtsov, W. Schuhmann and J. Masa, Trimetallic Mn-Fe-Ni Oxide Nanoparticles Supported on Multi-Walled Carbon Nanotubes as High-Performance Bifunctional ORR/OER Electrocatalyst in Alkaline Media,



*Adv. Funct. Mater.*, 2019, **30**.

21. J. Kim, J. N. Heo, J. Y. Do, R. K. Chava and M. Kang, Electrochemical Synergies of Heterostructured Fe<sub>2</sub>O<sub>3</sub>-MnO Catalyst for Oxygen Evolution Reaction in Alkaline Water Splitting, *Nanomaterials (Basel)*, 2019, **9**.
22. M. P. Suryawanshi, U. V. Ghorpade, S. W. Shin, U. P. Suryawanshi, H. J. Shim, S. H. Kang and J. H. Kim, Facile, Room Temperature, Electroless Deposited (Fe<sub>1-x</sub>, Mn<sub>x</sub>)OOH Nanosheets as Advanced Catalysts: The Role of Mn Incorporation, *Small*, 2018, **14**, e1801226.
23. M. Sun, R.-T. Gao, X. Liu, R. Gao and L. Wang, Manganese-based oxygen evolution catalysts boosting stable solar-driven water splitting: MnSe as an intermetallic phase, *J. Mater. Chem. A*, 2020, **8**, 25298-25305.
24. R.-L. Peng, J.-L. Li, X.-N. Wang, Y.-M. Zhao, B. Li, B. Y. Xia and H.-C. Zhou, Single-atom implanted two-dimensional MOFs as efficient electrocatalysts for the oxygen evolution reaction, *Inorg. Chem. Front.*, 2020, **7**, 4661-4668.
25. L. Shen, Q. Zhang, J. Luo, H. C. Fu, X. H. Chen, L. L. Wu, H. Q. Luo and N. B. Li, Heteroatoms Adjusting Amorphous FeMn-Based Nanosheets via a Facile Electrodeposition Method for Full Water Splitting, *ACS Sustainable Chem. Eng.*, 2021, **9**, 5963-5971.
